# Supplementary material for: A dynamical systems approach to the surface search for debris associated with the disappearance of flight MH370
Source: Copernicus journal article supplement (doi:10.5194/npg-22-701-2015), 2015-11-25
Supplement: Supplementary file [file npg-22-701-2015-supplement-title-page.pdf › npg-22-701-2015-supplement-title-page.pdf]

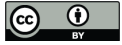

## *Supplement of*

# **A dynamical systems approach to the surface search for debris associated with the disappearance of flight MH370**

**V. J. García-Garrido et al.**

*Correspondence to:* A. M. Mancho (a.m.mancho@icmat.es)

- npg-22-701-2015-supplement-title-page.pdf
- \_\_MACOSX
  - .\_movieS1.mov
  - .\_movieS2.mov
  - .\_movieS3.mov
  - .\_movieS4.mov
- movieS1.mov
- movieS2.mov
- movieS3.mov
- movieS4.mov

The copyright of individual parts of the supplement might differ from the CC-BY 3.0 licence.
